# Supplementary material for: Discovery of a natural thiamine adenine nucleotide
Source: Springer Nature journal article supplement (doi:10.1038/nchembio867), 2007-03-04

**Supplementary Figure 1** Purification of AThTP on a Polaris C18 HPLC column. 100  $\mu$ l fractions of the partially purified compound (see **Supplementary Table 1** online) were injected and eluted in 50 mM ammonium acetate buffer (pH 7.0) in 5% methanol and 1 ml fractions were collected. The fractions were checked for the presence of AThTP by HPLC after derivatization to fluorescent compounds. It was eluted between 7 and 8 min (arrow). The corresponding fractions from 10 injections were pooled, lyophilized and analyzed by mass spectrometry and  $^1\text{H-NMR}$ .

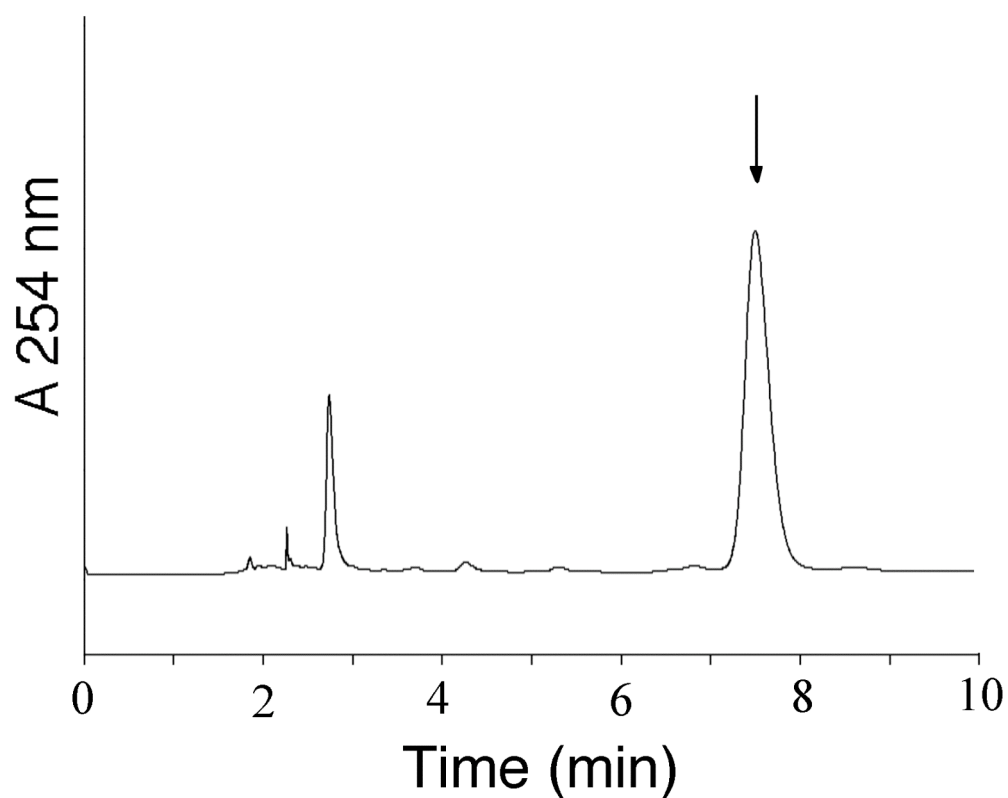

Supplement: 41589_2007_BFnchembio867_MOESM310_ESM.pdf [file 41589_2007_BFnchembio867_MOESM310_ESM.pdf]
