# Supplementary material for: Discovery of a natural thiamine adenine nucleotide
Source: Springer Nature journal article supplement (doi:10.1038/nchembio867), 2007-03-04
Supplement: 41589_2007_BFnchembio867_MOESM311_ESM.pdf [file 41589_2007_BFnchembio867_MOESM311_ESM.pdf]

**Supplementary Figure 2** High resolution positive ion ESI-FT-ICR mass spectrum of AThTP isolated from bacteria (**a1**). Theoretical isotopic distribution of  $C_{22}H_{31}N_9O_{13}P_3S^+$  (**a2**) and  $C_{22}H_{30}N_9O_{13}P_3SLi^+$  (**a3**). High resolution positive ion ESI-FT-ICR mass spectrum of chemically synthesized AThTP (**b1**). Theoretical isotopic distribution of  $C_{22}H_{31}N_9O_{13}P_3S^+$  (**b2**) and  $C_{22}H_{30}N_9O_{13}P_3SLi^+$  (**b3**). Positive ion ESI mass spectrum of AThTP isolated from bacteria (**c**). AThTP was diluted at a concentration of 150  $\mu$ M in H<sub>2</sub>O: acetonitrile (50% : 50%) containing 1 mM lithium iodide. The ESI-MS/MS fragmentation pattern for AThTP isolated from *E. coli* is shown in (**d**). Positive ion ESI mass spectrum of chemically synthesized AThTP (**e**), diluted at a concentration of 150  $\mu$ M in H<sub>2</sub>O : acetonitrile (50% : 50%) and the ESI-MS/MS fragmentation pattern (**f**).

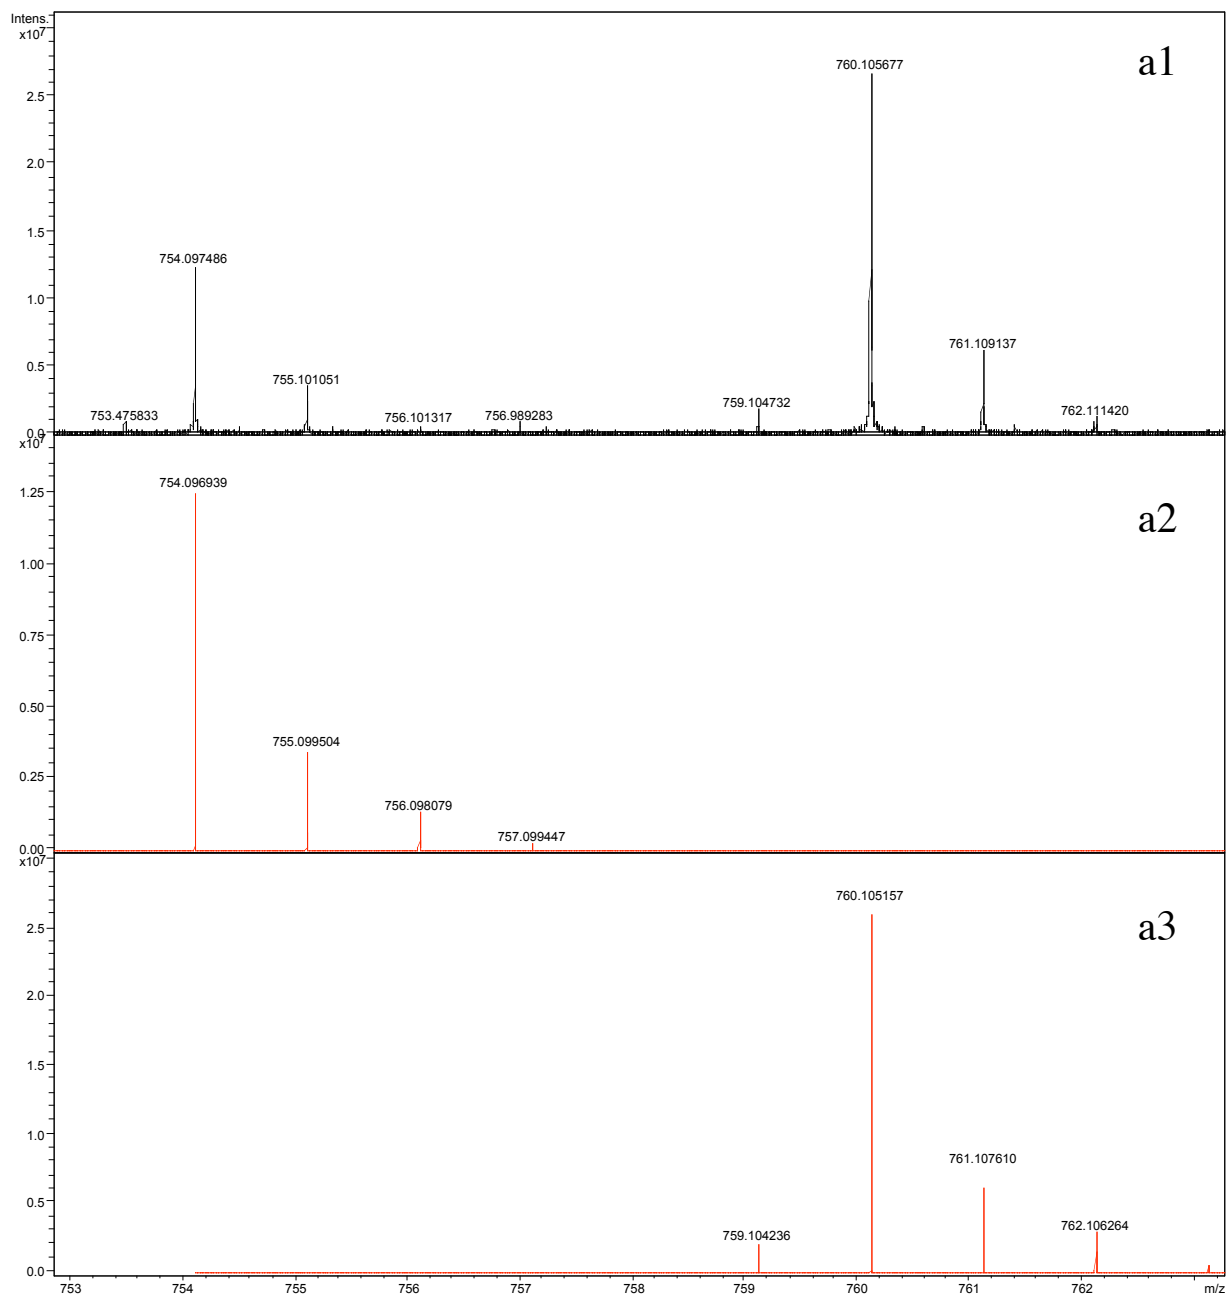

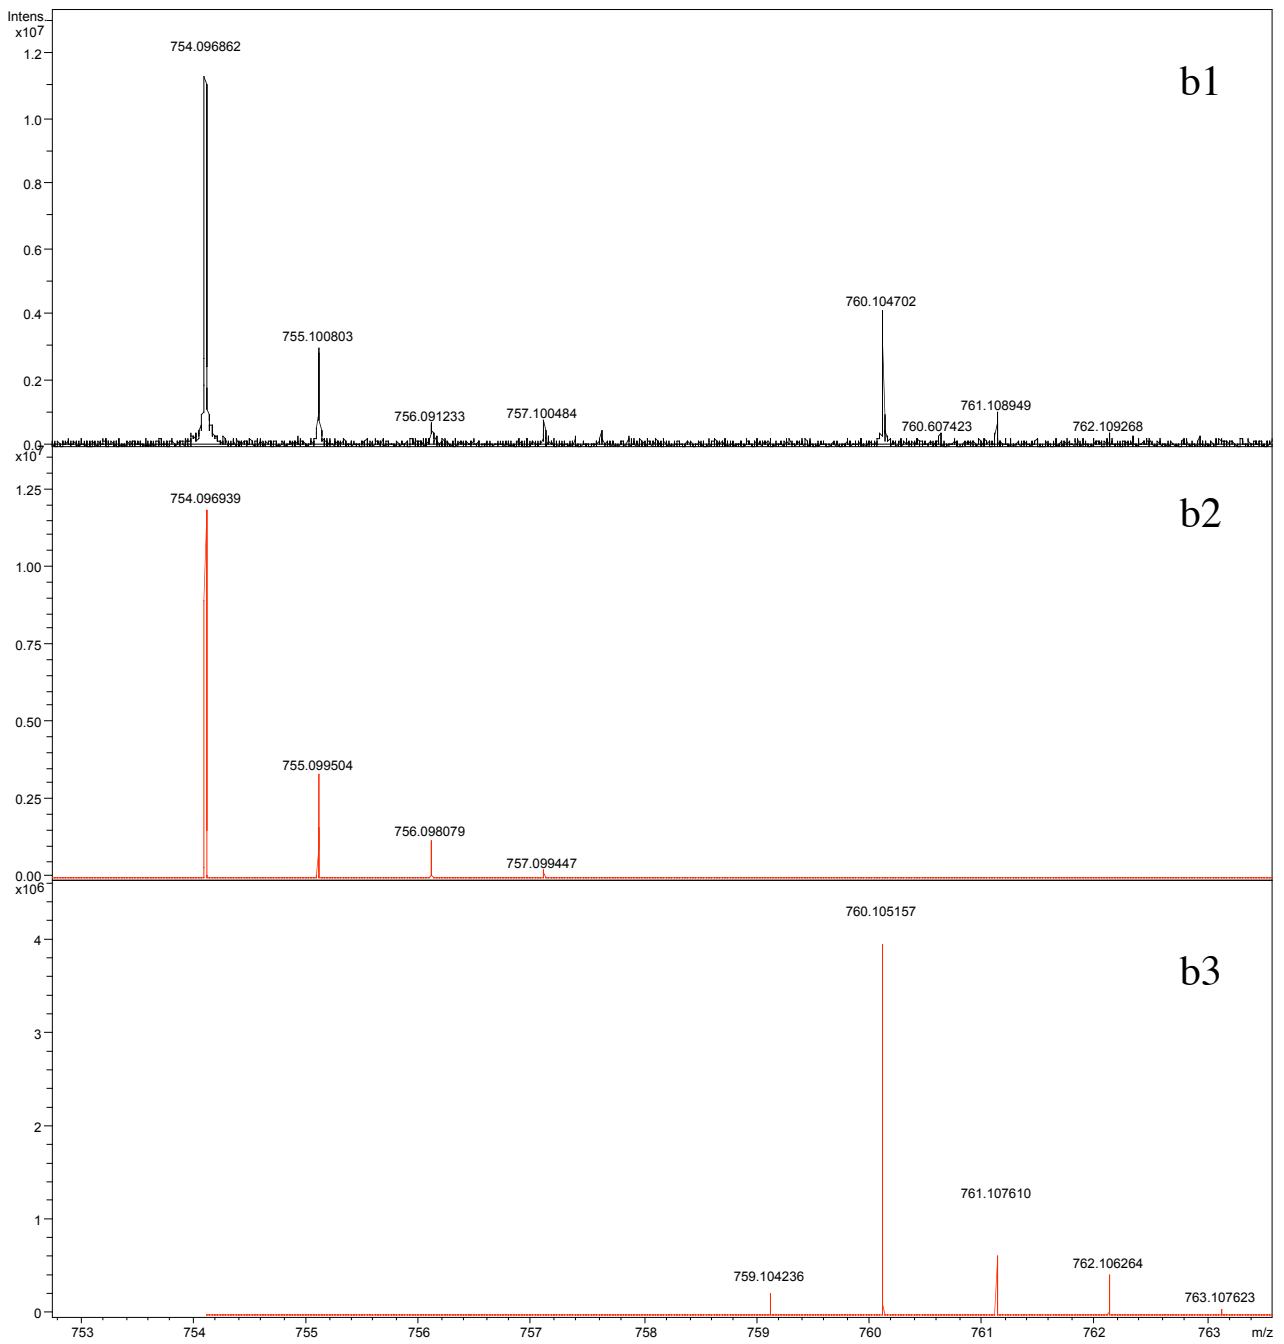

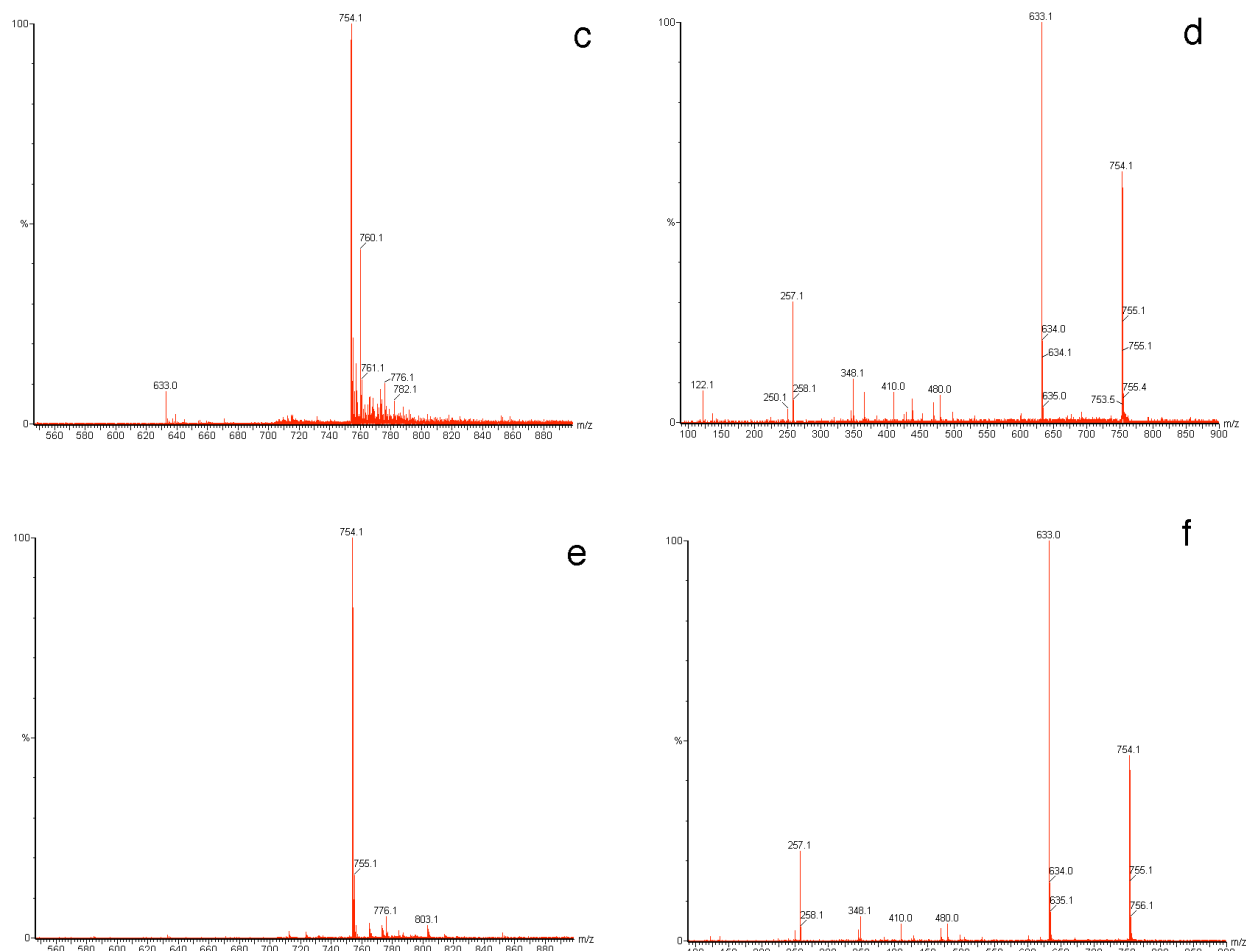

**AThTP analysis by electrospray tandem mass spectrometry.** Experiments were performed on a Micromass Q-TOF Ultima Global apparatus (Micromass, now Waters Corporation, Manchester, UK) operated in nano-ESI positive ion mode. The synthesized AThTP was injected at a concentration of 200  $\mu$ M in 50% water - 50% acetonitrile. Lithium iodide was added at a final concentration of 1 mM to the solution containing the purified AThTP from *E. coli* to suppress the multiple undesired salt adducts. The source parameters were: capillary voltage: 1.8 kV, cone voltage: 100 V, RF lens 1: 90 V, source temperature: 80  $^{\circ}$ C, collision energy: 6 eV. The fragmentation pattern of the mass 754.1 was obtained with 30 V acceleration voltage. The major product ions were of  $m/z$  633.1, 348.1 and 257.1. The 633.1 peak might arise from fragmentation at the level of the quaternary nitrogen of the thiazole moiety of thiamine with loss of the pyrimidinium part ( $M^{+} - 121 - \text{pyrimidinium}$ ), while the 348.1 ion might correspond to AMP.

**Determination of the exact mass of AThTP.** Experiments were performed on an ESI-FT-ICR mass spectrometer (Apex Qe 9.4 T, Bruker Daltonik GmbH, Bremen Germany) operated in positive ion mode. The mass spectrometer was calibrated with 0.1% phosphoric acid – 50% water – 50% acetonitrile solution in the range of the mass to be measured and gave a standard deviation accuracy of 0.284 ppm over eight calibration points. The synthesized and natural AThTP were injected separately at a concentration of 20  $\mu$ M in 50% water – 50% acetonitrile containing 20  $\mu$ M lithium iodide. External calibration was applied. The source parameters were: capillary voltage: 4.48 kV, capillary exit voltage: 60 V, desolvation gas temperature: 200 °C. Molecular formula were generated (see below) using the following parameters: relative mass tolerance: 1 ppm, minimum elements: H<sub>30</sub> (based on <sup>1</sup>H-NMR), maximum element: C<sub>∞</sub>H<sub>31</sub>N<sub>∞</sub>O<sub>∞</sub>P<sub>5</sub>S<sub>5</sub>Li, nitrogen rule applied.

Molecular formula generated for the natural compound (M<sup>+</sup>, M-H Li<sup>+</sup>).

M<sup>+</sup>

| Sum Formula                     | Sigma | m/z        | Err [ppm] | Mean Err [ppm] | Err [mDa] | rdb   | N Rule | e <sup>-</sup> |
|---------------------------------|-------|------------|-----------|----------------|-----------|-------|--------|----------------|
| C 22 H 31 N 9 O 13 P 3 S 1      | 0.029 | 754.096939 | -0.73     | -1.20          | -0.55     | 13.50 | ok     | even           |
| C 24 H 31 Li 1 N 1 O 22 P 2     | 0.038 | 754.096750 | -0.98     | -0.88          | -0.74     | 10.50 | ok     | even           |
| C 28 H 30 N 5 O 14 P 2 S 1      | 0.046 | 754.097971 | 0.64      | 0.29           | 0.49      | 17.50 | ok     | even           |
| C 25 H 30 Li 1 N 13 O 1 P 5 S 2 | 0.061 | 754.098032 | 0.72      | -0.05          | 0.55      | 19.50 | ok     | even           |
| C 32 H 30 Li 1 N 7 O 3 P 5 S 1  | 0.064 | 754.097347 | -0.18     | -0.48          | -0.14     | 23.50 | ok     | even           |
| C 38 H 31 N 1 O 8 P 3 S 1       | 0.087 | 754.097774 | 0.38      | 0.19           | 0.29      | 25.50 | ok     | even           |
| C 23 H 31 Li 1 N 11 O 6 P 2 S 4 | 0.090 | 754.097139 | -0.46     | -1.34          | -0.35     | 14.50 | ok     | even           |
| C 36 H 30 Li 1 N 1 O 9 P 1 S 3  | 0.105 | 754.097486 | -0.00     | -0.44          | -0.00     | 22.50 | ok     | even           |
| C 29 H 30 Li 1 N 7 O 7 P 1 S 4  | 0.105 | 754.098171 | 0.91      | 0.06           | 0.69      | 18.50 | ok     | even           |
| C 34 H 30 N 9 P 2 S 4           | 0.125 | 754.097674 | 0.25      | -0.58          | 0.19      | 25.50 | ok     | even           |
| C 41 H 30 N 3 O 2 P 2 S 3       | 0.130 | 754.096989 | -0.66     | -1.11          | -0.50     | 29.50 | ok     | even           |
| C 39 H 31 Li 1 N 3 O 1 P 2 S 4  | 0.135 | 754.097974 | 0.65      | -1.17          | 0.49      | 26.50 | ok     | even           |

M-H Li<sup>+</sup>

| Sum Formula                      | Sigma | m/z        | Err [ppm] | Mean Err [ppm] | Err [mDa] | rdb   | N Rule | e <sup>-</sup> |
|----------------------------------|-------|------------|-----------|----------------|-----------|-------|--------|----------------|
| C 17 H 31 N 15 O 10 P 5          | 0.007 | 760.106091 | 0.54      | 0.09           | 0.41      | 12.50 | ok     | even           |
| C 25 H 30 N 1 O 26               | 0.035 | 760.105057 | -0.82     | -0.86          | -0.62     | 11.50 | ok     | even           |
| C 18 H 30 N 7 O 24 S 1           | 0.038 | 760.105742 | 0.09      | -0.46          | 0.06      | 7.50  | ok     | even           |
| C 22 H 30 Li 1 N 9 O 13 P 3 S 1  | 0.038 | 760.105118 | -0.74     | -1.23          | -0.56     | 13.50 | ok     | even           |
| C 23 H 31 Li 1 N 1 O 25 S 1      | 0.043 | 760.106042 | 0.48      | 0.17           | 0.36      | 8.50  | ok     | even           |
| C 15 H 30 Li 1 N 15 O 11 P 3 S 2 | 0.048 | 760.105803 | 0.17      | -0.02          | 0.13      | 9.50  | ok     | even           |
| C 21 H 31 N 9 O 16 P 1 S 2       | 0.058 | 760.106230 | 0.73      | -0.05          | 0.55      | 11.50 | ok     | even           |
| C 20 H 30 N 17 O 4 P 4 S 2       | 0.064 | 760.105306 | -0.49     | -0.53          | -0.37     | 16.50 | ok     | even           |
| C 25 H 31 Li 1 N 11 O 5 P 4 S 2  | 0.065 | 760.105606 | -0.09     | 0.01           | -0.07     | 17.50 | ok     | even           |
| C 18 H 31 Li 1 N 17 O 3 P 4 S 3  | 0.066 | 760.106291 | 0.81      | 0.53           | 0.61      | 13.50 | ok     | even           |
| C 28 H 31 N 3 O 18 P 1 S 1       | 0.067 | 760.105545 | -0.17     | -0.61          | -0.13     | 15.50 | ok     | even           |
| C 32 H 31 Li 1 N 5 O 7 P 4 S 1   | 0.074 | 760.104921 | -1.00     | -1.32          | -0.76     | 21.50 | ok     | even           |
| C 38 H 30 Li 1 N 1 O 8 P 3 S 1   | 0.098 | 760.105953 | 0.36      | 0.11           | 0.28      | 25.50 | ok     | even           |
| C 22 H 31 Li 1 N 11 O 9 S 5      | 0.112 | 760.106431 | 0.99      | 0.01           | 0.75      | 12.50 | ok     | even           |
| C 24 H 30 N 11 O 10 S 4          | 0.114 | 760.105445 | -0.30     | -0.21          | -0.23     | 15.50 | ok     | even           |
| C 29 H 31 Li 1 N 5 O 11 S 4      | 0.118 | 760.105745 | 0.09      | 0.27           | 0.07      | 16.50 | ok     | even           |
| C 17 H 30 N 17 O 8 S 5           | 0.119 | 760.106131 | 0.60      | 0.31           | 0.45      | 11.50 | ok     | even           |
| C 27 H 31 N 13 O 2 P 1 S 5       | 0.132 | 760.105934 | 0.34      | -0.71          | 0.26      | 19.50 | ok     | even           |
| C 34 H 31 N 7 O 4 P 1 S 4        | 0.134 | 760.105248 | -0.56     | -1.13          | -0.43     | 23.50 | ok     | even           |
| C 43 H 30 N 3 O 1 P 4 S 1        | 0.140 | 760.105456 | -0.29     | -0.48          | -0.22     | 32.50 | ok     | even           |
| C 40 H 30 N 3 O 5 S 4            | 0.152 | 760.106280 | 0.79      | -0.75          | 0.60      | 27.50 | ok     | even           |

Molecular formula generated for the synthesized compound (M<sup>+</sup>, M-H Li<sup>+</sup>).

M<sup>+</sup>

|  | Sum Formula                     | Sigma | m/z        | Err [ppm] | Mean Err [ppm] | Err [mDa] | rdb   | N Rule | e <sup>-</sup> |
|--|---------------------------------|-------|------------|-----------|----------------|-----------|-------|--------|----------------|
|  | C 19 H 30 N 7 O 21 P 2          | 0.030 | 754.096451 | -0.55     | -0.73          | -0.41     | 9.50  | ok     | even           |
|  | C 22 H 31 N 9 O 13 P 3 S 1      | 0.037 | 754.096939 | 0.10      | -0.66          | 0.08      | 13.50 | ok     | even           |
|  | C 24 H 31 Li 1 N 1 O 22 P 2     | 0.045 | 754.096750 | -0.15     | -0.02          | -0.11     | 10.50 | ok     | even           |
|  | C 29 H 31 N 3 O 15 P 3          | 0.046 | 754.096253 | -0.81     | -0.70          | -0.61     | 17.50 | ok     | even           |
|  | C 20 H 30 Li 1 N 9 O 14 P 1 S 3 | 0.068 | 754.096651 | -0.28     | -0.65          | -0.21     | 10.50 | ok     | even           |
|  | C 32 H 30 Li 1 N 7 O 3 P 5 S 1  | 0.073 | 754.097347 | 0.64      | -0.02          | 0.48      | 23.50 | ok     | even           |
|  | C 25 H 30 N 11 O 7 P 2 S 3      | 0.074 | 754.096154 | -0.94     | -1.25          | -0.71     | 17.50 | ok     | even           |
|  | C 18 H 30 N 17 O 5 P 2 S 4      | 0.079 | 754.096839 | -0.03     | -0.84          | -0.02     | 13.50 | ok     | even           |
|  | C 39 H 30 Li 1 N 1 O 5 P 5      | 0.086 | 754.096661 | -0.27     | 0.17           | -0.20     | 27.50 | ok     | even           |
|  | C 30 H 31 Li 1 N 5 O 8 P 2 S 3  | 0.087 | 754.096454 | -0.54     | -0.60          | -0.41     | 18.50 | ok     | even           |
|  | C 23 H 31 Li 1 N 11 O 6 P 2 S 4 | 0.088 | 754.097139 | 0.37      | -0.21          | 0.28      | 14.50 | ok     | even           |
|  | C 36 H 30 Li 1 N 1 O 9 P 1 S 3  | 0.106 | 754.097486 | 0.83      | -0.21          | 0.62      | 22.50 | ok     | even           |
|  | C 41 H 30 N 3 O 2 P 2 S 3       | 0.133 | 754.096989 | 0.17      | -0.52          | 0.13      | 29.50 | ok     | even           |

M-H Li<sup>+</sup>

|  | Sum Formula                     | Sigma | m/z        | Err [ppm] | Mean Err [ppm] | Err [mDa] | rdb   | N Rule | e <sup>-</sup> |
|--|---------------------------------|-------|------------|-----------|----------------|-----------|-------|--------|----------------|
|  | C 19 H 31 N 5 O 25 P 1          | 0.017 | 760.104025 | -0.89     | -1.20          | -0.68     | 7.50  | ok     | even           |
|  | C 25 H 30 N 1 O 26              | 0.019 | 760.105057 | 0.47      | 0.31           | 0.35      | 11.50 | ok     | even           |
|  | C 20 H 30 N 17 O 4 P 4 S 2      | 0.034 | 760.105306 | 0.79      | -0.51          | 0.60      | 16.50 | ok     | even           |
|  | C 22 H 30 Li 1 N 9 O 13 P 3 S 1 | 0.041 | 760.105118 | 0.55      | -0.22          | 0.42      | 13.50 | ok     | even           |
|  | C 27 H 30 N 11 O 6 P 4 S 1      | 0.047 | 760.104621 | -0.11     | -0.91          | -0.08     | 20.50 | ok     | even           |
|  | C 29 H 30 Li 1 N 3 O 15 P 3     | 0.050 | 760.104432 | -0.36     | -0.44          | -0.27     | 17.50 | ok     | even           |
|  | C 20 H 31 Li 1 N 7 O 18 S 3     | 0.060 | 760.104225 | -0.63     | -1.69          | -0.48     | 8.50  | ok     | even           |
|  | C 32 H 31 Li 1 N 5 O 7 P 4 S 1  | 0.067 | 760.104921 | 0.29      | -0.26          | 0.22      | 21.50 | ok     | even           |
|  | C 18 H 31 N 15 O 9 P 1 S 4      | 0.070 | 760.104413 | -0.38     | -1.81          | -0.29     | 11.50 | ok     | even           |
|  | C 24 H 30 N 11 O 10 S 4         | 0.087 | 760.105445 | 0.98      | -0.39          | 0.74      | 15.50 | ok     | even           |
|  | C 31 H 30 N 5 O 12 S 3          | 0.089 | 760.104760 | 0.08      | -0.90          | 0.06      | 19.50 | ok     | even           |
|  | C 37 H 31 N 7 P 5 S 1           | 0.094 | 760.104424 | -0.37     | -0.97          | -0.28     | 28.50 | ok     | even           |
|  | C 35 H 30 Li 1 N 7 O 1 P 3 S 3  | 0.100 | 760.104136 | -0.75     | -1.60          | -0.57     | 25.50 | ok     | even           |
|  | C 34 H 31 N 7 O 4 P 1 S 4       | 0.109 | 760.105248 | 0.72      | -0.41          | 0.55      | 23.50 | ok     | even           |
|  | C 43 H 30 N 3 O 1 P 4 S 1       | 0.122 | 760.105456 | 0.99      | 0.47           | 0.75      | 32.50 | ok     | even           |
|  | C 41 H 31 N 1 O 6 P 1 S 3       | 0.128 | 760.104563 | -0.18     | -0.99          | -0.14     | 27.50 | ok     | even           |
