# Supplementary material for: Discovery of a natural thiamine adenine nucleotide
Source: Springer Nature journal article supplement (doi:10.1038/nchembio867), 2007-03-04
Supplement: 41589_2007_BFnchembio867_MOESM315_ESM.pdf [file 41589_2007_BFnchembio867_MOESM315_ESM.pdf]

**Supplementary Table 2 Effect of media composition on the contents of ThTP and AThTP in *E. coli***

| Incubation medium                                 | ThTP<br>(pmol/mg of protein) | AThTP<br>(pmol/mg of protein) |
|---------------------------------------------------|------------------------------|-------------------------------|
| Minimal M9 medium                                 | n. d.                        | 111 ± 11                      |
| M9 + D-glucose (10 mM)                            | 240 ± 40                     | n. d.                         |
| Nitrogen-free minimal medium (a)                  | n. d.                        | 79 ± 13                       |
| Nitrogen-free minimal medium + D-glucose (10 mM)  | 326 ± 60                     | n. d.                         |
| Phosphate-free minimal medium (b)                 | n. d.                        | 120 ± 15                      |
| Phosphate-free minimal medium + D-glucose (10 mM) | 121 ± 2                      | n. d.                         |
| M9 + pyruvate (10 mM)                             | 90 ± 39                      | n. d.                         |
| M9 + L-lactate (10 mM)                            | 67 ± 10                      | 5 ± 1                         |
| M9 + L-malate (10 mM)                             | n. d.                        | n. d.                         |
| M9 + amino acids (c)                              | 15 ± 4                       | n. d.                         |

The bacteria (BL-21) were grown overnight in LB medium, suspended in minimal medium (M9 or modified as indicated) and incubated 1 h at 37 °C, 250 rpm. After incubation, the bacteria were sedimented (5 min, 10,000 x g) and the pellets were suspended in 12% (w/v) trichloroacetic acid and centrifuged. The supernatant was extracted with diethyl ether and the thiamine compounds were determined by HPLC after derivatization to thiochrome derivatives. The results are expressed as mean ± SD for 3 – 6 experiments.

n. d.: not detected (< 5 pmol/mg for ThTP and < 2.5 pmol/mg for AThTP)

M9 medium contained Na<sub>2</sub>HPO<sub>4</sub>, 6 g/l; KH<sub>2</sub>PO<sub>4</sub>, 3 g/l; NaCl, 0.5 g/l; NH<sub>4</sub>Cl, 1 g/l; CaCl<sub>2</sub>, 3 mg/l; MgSO<sub>4</sub>, 1 mM, pH 7.0

(a) The nitrogen-free medium had the same composition as M9 medium but NH<sub>4</sub>Cl was omitted and the NaCl concentration was 1.5 g/l

(b) The phosphate-free minimal medium contained HEPES-Na 20 mM, pH 7.0 ; NaCl, 52 mM ; KCl, 11 mM ; NH<sub>4</sub>Cl, 1 g/l ; CaCl<sub>2</sub>, 3 mg/l ; MgSO<sub>4</sub>, 1 mM.

(c) The amino acid mixture contained all 20 amino acids, each at 0.5 mM except for tyrosine (0.05 mM) and tryptophan (0.1 mM).
